# Supplementary material for: Genetic and Clinical Analyses of DOA and LHON in 304 Chinese Patients with Suspected Childhood-Onset Hereditary Optic Neuropathy
Source: PLoS One. 2017 Jan 12;12(1):e0170090. doi: 10.1371/journal.pone.0170090 (PMC5230780; doi:10.1371/journal.pone.0170090)
Supplement: S2 Table — (XLSX) [file pone.0170090.s003.xlsx]

## Sheet: S2_Table
S2 Table. Primers Used for OPA1 Amplification and Sequencing
Primer Name	Primer Sequence (5’-3’)	Annealing Temperature(°C)	Product Length
Exon-1-F	CACTTCCTGGGTCATTCCTG	Touchdown﹟	234
Exon-1-R	CCTGGCCTGAGAGTCACCT
Exon-2-F	GGTTAGTCACGTATGGGGCT	Touchdown	664
Exon-2-R	GTTCCTATTCCCAGCCCTGT
Exon-3-F	TGCTTGTTTGCTGAGACCAC	Touchdown	450
Exon-3-R	AGTTAGTGGCAGCTGTGGTA
Exon-4-F	CTCCTCCACTTCCTTGCTGT	Touchdown	485
Exon-4-R	GGAACTGTCATTTTACTGGGCT
Exon-4b-F	ACTTGGCTTTTAGTGAGGGGA	Touchdown	675
Exon-4b-R	AACCATGACAGGGCAGATGA
Exon-5-F	CTGCACAGGTTATCAGTCATGT	Touchdown	416
Exon-5-R	CCAGAACTGCCACGTAATACC
Exon-5b-F	CCATCCCTCCCTAGCTTACA	Touchdown	379
Exon-5b-R	ACCCACTCCAGAAAAGTTACAT
Exon-6-F	CTTTCATAAGAAATGACTAGAATAGCAACA	Touchdown	416
Exon-6-R	TGGGCATAAGATTCACTCAAAATAGG
Exon-7-F	TGGCCCTGTAATGTGAAGACT	Touchdown	614
Exon-7-R	GATCCTCCATCCTCCAAGCA
Exon-8-F	CTAAATAAACTGAATGAGAAATGGAC	Touchdown	578
Exon-8-R	ACATTACTTGGAACATGTAAGATTAC
Exon-9-F	CACACATGCATCAATCACCAT	Touchdown	479
Exon-9-R	CTCTCCTACCACTCTCCCCT
Exon-10-11-F	CCAGCAGTAGTGTGAAGGGA	Touchdown	637
Exon-10-11-R	CCATTCAGATAAGACGCTCACA
Exon-12-13-F	TGTGAGCGTCTTATCTGAATGG	Touchdown	745
Exon-12-13-R	CGTTCAGCATCCACAGATCC
Exon-14-F	GCCATCATACTGTGTATTCAAGG	Touchdown	699
Exon-14-R	AAAACGTGAGCCTGGTTTCC
Exon-15-16-F	CCGGGTTTTCGATACGTGTG	Touchdown	695
Exon-15-16-R	TCCAAGGAAGCATGCCAGTA
Exon-17-F	TGAAAGGTAAGAGTGGCTGTT	Touchdown	462
Exon-17-R	TCTCATCTGTTTGAACTCTGCA
Exon-18-F	GTCATAGGCGCACTCTCAGA	Touchdown	439
Exon-18-R	AGCACATTCATTACCTTCTCAGA
Exon-19-F	ACCCAAATTCAGCCTAGTCAA	Touchdown	677
Exon-19-R	GACAAAACTTCTGCCCAAAGG
Exon-20-F	TGACTGGTGCGATTTACAGG	Touchdown	470
Exon-20-R	TCCCAAAACAGAGATGAGGAA
Exon-21-F	GGAAGCCATATCTGTCCCCA	Touchdown	540
Exon-21-R	GGTGATTTTAGAAGGGCAGGG
Exon-22-F	AGCAGGCAAGTAAAAGAAGCT	Touchdown	484
Exon-22-R	GCATATAAGCATCATGTGTCCAT
Exon-23-F	GCCATATCAGTCATGTGGGTTT	Touchdown	348
Exon-23-R	AAAACATTTAATATTCCTGAGACTGG
Exon-24-F	TATTCATAAGCCGGGGTGCT	Touchdown	479
Exon-24-R	TCCTTCTCTTCACGCAATCAA
Exon-25-F	ACCTACCCTGTCTACTCCACA	Touchdown	594
Exon-25-R	ACGAACAAAGTGGCAAATATCTT
Exon-26-F	TGGCTCCGTACAGAAAGGAT	Touchdown	394
Exon-26-R	CACACCTGGCCAGTTTTTCT
Exon-27-F	TGCATGAAACTCTGTTGGGA	Touchdown	577
Exon-27-R	CTGACCTTGTTTTCCACCCA
Exon-28-F	TCAGTCAGTCTCTCCTCCCA	Touchdown	391
Exon-28-R	ACAGCATAAGTGACAAGCAGG
#Touchdown PCR amplification consisted of a denaturizing step at 95°C for 5 minutes, followed by 35
cycles of amplification (at 95°C for 30 seconds, at 65~58°C for 30 seconds starting from 65°C with
decreasing by 0.5°C every cycle for 14 cycles until remaining at 58°C for 21 cycles, and at 72°C for 40
seconds), and a final extension at 72°C for 10 minutes.
